# Supplementary material for: Response to Therapeutic Plasma Exchange as a Rescue Treatment in Clinically Isolated Syndromes and Acute Worsening of Multiple Sclerosis: A Retrospective Analysis of 90 Patients
Source: PubMed Central journal article supplement (PMC4526633; doi:10.1371/journal.pone.0134583), 2015-08-05
Supplement: pone.0134583.s001.pdf [file pone.0134583.s001.pdf]

**Table A in S1 File: Diagnostic findings before the initiation of treatment**

|                               | T <sub>2</sub> lesions in MRI (%) |        | Gd <sup>+</sup> lesions in MRI (%) |        | Pathologic MEP | Pathologic SSEP | Pathologic VEP |
|-------------------------------|-----------------------------------|--------|------------------------------------|--------|----------------|-----------------|----------------|
|                               | brain                             | spinal | brain                              | spinal |                |                 |                |
| <b>CIS</b><br><b>(n=21)</b>   | 71.4                              | 65.0   | 52.4                               | 33.3   | 10 of 16       | 10 of 18        | 16 of 17       |
| <b>RR-MS</b><br><b>(n=46)</b> | 100                               | 80.0   | 52.2                               | 28.6   | 18 of 24       | 23 of 29        | 18 of 29       |
| <b>SP-MS</b><br><b>(n=18)</b> | 100                               | 100    | 77.8                               | 22.2   | 10 of 11       | 9 of 9          | 8 of 8         |
| <b>PP-MS</b><br><b>(n=5)</b>  | 100                               | 100    | 20.0                               | 20.0   | 5 of 5         | 5 of 5          | 5 of 5         |
| <b>Total</b><br><b>(n=90)</b> | 77.8                              | 61.1   | 44.4                               | 20.2   | 43 of 56       | 53 of 60        | 41 of 60       |

CIS = clinically isolated syndrome, Gd<sup>+</sup> = gadolinium contrast medium enhancement, MEP = motor-evoked potentials, MRI = magnetic resonance imaging, MS = multiple sclerosis, PP-MS = primary progressive MS with acute worsening, RR-MS = relapsing-remitting MS, SP-MS = secondary progressive MS with superimposed relapse, SSEP = somatosensory-evoked potentials, VEP = visual-evoked potentials, T<sub>2</sub> = T<sub>2</sub> weighted imaging. Pathologic result of MEP/SSEP/VEP = loss of potential or prolonged latency or definite site difference

**Table B in S1 File: Administration of disease modifying drugs before the initiation of therapeutic plasma exchange (n=47)**

| <b>Disease modifying drug</b> | <b>N</b> |
|-------------------------------|----------|
| Interferone beta 1-a          | 12       |
| Interferone beta 1-b          | 3        |
| Intravenous immunglobuline    | 3        |
| Mitoxantrone                  | 8        |
| Azathioprine                  | 2        |
| Natalizumab                   | 3        |
| Intermittent GCS treatment    | 8        |
| Glatirameracetate             | 7        |
| Cyclophosphamide              | 1        |

GCS = Glucocorticosteroid

**Table C in S1 File: Univariate statistical analysis of therapeutic plasma exchange in clinically isolated syndrome and multiple sclerosis patients**

| <b>Variable</b>                         | <b>TPE response<br/>(n)</b> | <b>TPE non-response<br/>(n)</b> | <b>Total<br/>(n)</b> | <b><i>p</i></b> |
|-----------------------------------------|-----------------------------|---------------------------------|----------------------|-----------------|
| <b>Group analysis</b>                   |                             |                                 |                      |                 |
| CIS vs. RR-MS                           | 17 vs. 38                   | 4 vs. 8                         | 21/46                | 1.000           |
| CIS vs. SP-MS                           | 17 vs.7                     | 4 vs. 11                        | 21/18                | <b>0.010</b>    |
| RR-MS vs. SP-MS                         | 38 vs. 7                    | 8 vs. 11                        | 46/18                | <b>0.002</b>    |
| CIS/RR-MS vs.<br>SP-MS/PP-MS            | 55 vs. 10                   | 12 vs. 13                       | 67/23                | <b>0.001</b>    |
| <b>Gender</b>                           |                             |                                 |                      | 0.451           |
| Male                                    | 22                          | 6                               | 28                   |                 |
| Female                                  | 43                          | 19                              | 62                   |                 |
| <b>Age in years<br/>(median, range)</b> | 35.0 (18-69)                | 41.0 (20-66)                    |                      | 0.057           |
| <b>DMD</b>                              |                             |                                 |                      |                 |
| Yes                                     | 28                          | 18                              | 46                   |                 |
| No                                      | 37                          | 7                               | 44                   | <b>0.017</b>    |
| <b>Disease activity<br/>before TPE</b>  |                             |                                 |                      | 0.488           |
| 0 relapses                              | 17                          | 4                               | 21                   |                 |

|                                       |    |    |    |              |
|---------------------------------------|----|----|----|--------------|
| 1 relapse                             | 1  | 1  | 2  |              |
| ≥ 2 relapses                          | 47 | 20 | 67 |              |
| <b>Worsening during GCS treatment</b> |    |    |    |              |
| Yes                                   | 16 | 12 | 28 |              |
| No                                    | 49 | 13 | 62 | <b>0.043</b> |
| <b>Time to TPE</b>                    |    |    |    | 1.000        |
| ≤ 6 weeks                             | 18 | 7  | 25 |              |
| > 6 weeks                             | 47 | 18 | 65 |              |
| <b>Symptom extent before TPE</b>      |    |    |    | 0.343        |
| Monosymptomatic                       | 9  | 6  | 15 |              |
| Polysymptomatic                       | 56 | 19 | 75 |              |
| <b>GCS treatment before TPE</b>       |    |    |    | 0.104        |
| 1g MP only                            | 16 | 10 | 26 |              |
| 1g and 2g MP                          | 44 | 11 | 55 |              |
| <b>MEP before TPE</b>                 |    |    |    | 0.082        |
| Pathologic                            | 28 | 15 | 43 |              |
| Physiologic                           | 12 | 1  | 13 |              |

|                                      |    |    |    |              |
|--------------------------------------|----|----|----|--------------|
| <b>VEP before TPE</b>                |    |    |    | 0.346        |
| Pathologic                           | 29 | 12 | 41 |              |
| Physiologic                          | 16 | 3  | 19 |              |
| <b>SSEP before TPE</b>               |    |    |    | 0.173        |
| Pathologic                           | 37 | 16 | 53 |              |
| Physiologic                          | 7  | 0  | 7  |              |
| <b>T<sub>2</sub> lesions in MRI</b>  |    |    |    | 1.000        |
| Detected                             | 57 | 19 | 76 |              |
| Not detected                         | 1  | 0  | 1  |              |
| <b>Gd<sup>+</sup> lesions in MRI</b> |    |    |    |              |
| Detected                             | 42 | 5  | 47 | <b>0.001</b> |
| Not detected                         | 16 | 14 | 30 |              |
| <b>EDSS before TPE</b>               |    |    |    |              |
| EDSS ≤ 5                             | 46 | 10 | 56 | <b>0.014</b> |
| EDSS > 5                             | 19 | 15 | 34 |              |

CIS = Clinically Isolated Syndrome, DMD = Disease modifying drug, EDSS = Expanded disability status scale, Gd<sup>+</sup> = Gadolinium contrast medium enhancement, GCS = Glucocorticosteroid, MEP = Motor-evoked potentials, Monosymptomatic = single functional system affected, MRI = Magnetic resonance imaging, MS = Multiple sclerosis, Polysymptomatic = ≥ 2 functional systems affected, PP-MS = Primary

progressive MS with acute worsening, RR-MS = Relapsing-remitting MS, SP-MS = Secondary progressive MS with superimposed relapse, SSEP = Somatosensory-evoked potentials, T<sub>2</sub> = T<sub>2</sub> weighted imaging, TPE = Therapeutic plasma exchange, VEP = Visual-evoked potentials, vs. = versus. Pathologic result of MEP/SSEP/VEP = loss of potential or prolonged latency or definite site difference.

PP-MS patients excluded due to low patient number of this group.
